## 1 A sensitized genetic screen to identify regulators of *C. elegans* germline stem cells

2 Authors: Sarah Robinson-Thiewes<sup>1,4</sup>, Aaron M. Kershner<sup>2</sup>, Heaji Shin<sup>3,5</sup>, Kimberly A. Haupt<sup>3,6</sup>, Peggy  
3 Kroll-Connor<sup>2,3</sup>, and Judith Kimble<sup>1,2,3</sup>

4 <sup>1</sup>Department of Genetics, University of Wisconsin-Madison, <sup>2</sup>Howard Hughes Medical Institute, and

5 <sup>3</sup>Department of Biochemistry, University of Wisconsin-Madison

6 <sup>4</sup>Current address: Department of Chemical Biology and Therapeutics, St Jude Children's Research  
7 Hospital, Memphis, TN 38105

8 <sup>5</sup>Current address: The David H. Koch Institute for Integrative Cancer Research at MIT, Department of  
9 Biology, MIT, Cambridge, MA 02139

10 <sup>6</sup>Current address: Promega Corporation, 2800 Woods Hollow Rd, Fitchburg, WI 53711

11

12

13 Keywords: *C. elegans*, stem cells, Notch, DNA polymerase, forward genetics screen

### 14 Abstract:

15 Germline stem cells (GSCs) in *Caenorhabditis elegans* are maintained by GLP-1/Notch signaling from the  
16 niche and by a downstream RNA regulatory network. Loss of the GLP-1 receptor causes GSCs to  
17 precociously undergo meiotic differentiation, the "Glp" phenotype, due to a failure to self-renew. *Ist-1*  
18 and *sygl-1* are functionally redundant direct targets of GLP-1 signaling whose gene products work with  
19 PUF RNA binding proteins to promote GSC self-renewal. Whereas single loss-of-function mutants are  
20 fertile, *Ist-1 sygl-1* double mutants are sterile and Glp. We set out to identify genes that function  
21 redundantly with either *Ist-1* or *sygl-1* to maintain GSCs. To this end, we conducted forward genetic  
22 screens for Glp mutants in genetic backgrounds lacking functional copies of either *Ist-1* or *sygl-1*. The  
23 screens generated nine *glp-1* alleles, two *Ist-1* alleles, and one allele of *pole-1*, which encodes the  
24 catalytic subunit of DNA polymerase  $\epsilon$ . Three *glp-1* alleles reside in Ankyrin (ANK) repeats not previously  
25 mutated. *pole-1* single mutants have a low penetrance Glp that is enhanced by loss of either *Ist-1* or  
26 *sygl-1*. Thus, the screen uncovered one locus that interacts genetically with both *Ist-1* and *sygl-1* and  
27 generated useful mutations for further studies of GSC regulation.

### 28 Introduction:

29 Stem cells maintain a robust balance between self-renewal and differentiation to ensure tissue  
30 homeostasis despite physiological and environmental challenges. Failure to maintain that balance can  
31 lead to tissue dysfunction, disease, and death (Simons and Clevers 2011). Therefore, understanding the  
32 molecular circuitry governing stem cell regulation is critical. Yet biologically robust regulatory circuits are  
33 notoriously difficult to disentangle.

34 The *C. elegans* germline is a powerful system for the study of stem cell regulation (Hubbard and  
35 Schedl 2019; Gordon 2020). The adult hermaphrodite germline is contained in two U-shaped gonadal  
36 arms and produces oocytes; sperm are made during larval development and stored for later fertilization  
37 (Figure 1A, top). Germline stem cells (GSCs) are maintained at the distal end of each gonadal arm by a  
38 single-celled somatic niche, while GSC daughters differentiate as they move proximally away from the  
39 niche and ultimately undergo oogenesis (Figure 1A, middle)(Hubbard and Greenstein 2000).

40 GSC self-renewal depends on GLP-1/Notch signaling from the niche and on a downstream RNA  
41 regulatory network. In *glp-1* null mutants, GSCs fail to self-renew and instead differentiate precociously

42 into sperm—the “Glp” phenotype (Austin and Kimble, 1987) (Figure 1A, bottom). Downstream of GLP-  
43 1/Notch, a “PUF hub” is required for self-renewal (Figure 1B). This regulatory hub comprises four genes  
44 encoding PUF RNA binding proteins as well as two direct GLP-1/Notch target genes, *lst-1* and *sygl-1*, that  
45 encode novel PUF interacting proteins (Crittenden *et al.* 2002; Kershner *et al.* 2014; Shin *et al.* 2017;  
46 Haupt *et al.* 2019a, 2019b; Qiu *et al.* 2019).

47 The PUF hub is characterized by pervasive genetic redundancy. For example, mutants lacking three  
48 PUF homologs are able to sustain some GSC self-renewing divisions, but animals lacking all four  
49 homologs phenocopy *glp-1* null mutants (Haupt *et al.* 2019b). Moreover, single mutants lacking *lst-1* or  
50 *sygl-1* are fertile and similar to the wildtype, while *lst-1 sygl-1* double mutants phenocopy *glp-1* null  
51 mutants (Figure 1C) (Kershner *et al.* 2014). The highly redundant nature of the PUF hub has hampered  
52 the identification of its component parts. Indeed, the LST-1 and SYGL-1 were not identified using  
53 standard forward genetic approaches, but instead were discovered using a candidate gene approach  
54 (Kershner *et al.* 2014), leaving open the possibility that additional components remain unidentified. For  
55 example, the LST-1 or SYGL-1 proteins might work with other unknown redundant factors. Here we  
56 describe the results of mutagenesis screens designed to identify regulators that function redundantly  
57 with *lst-1* or *sygl-1*.

## 58 **Methods:**

59 *Strain Maintenance:* Unless noted otherwise, strains were maintained as previously described (Brenner  
60 1974), at a temperature of 15°C. Balancers used to maintain recovered alleles were *hT2[qIs48]*  
61 (Siegfried and Kimble 2002) and *hIn1[unc-54(h1040)]* (Zetka and Rose 1992). Table 1 lists the strains  
62 used and their genotypes.

63 *Screen design and phenotype scoring:* We screened for *lst-1* or *sygl-1* enhancers using a modified ethyl  
64 methanesulfonate (EMS) protocol (Brenner 1974). Fourth larval stage (L4) hermaphrodites were soaked  
65 in 25 mM EMS (Sigma: M0880) for 4 hours at room temperature, washed with M9, and placed on plates.  
66 F1 progeny were singled onto individual Petri dishes and allowed to self at 15°C. F2 adult progeny were  
67 scored for sterility by dissecting scope, and then L4 larvae were scored for a Glp phenotype using a Zeiss  
68 Axioskop compound scope equipped with DIC Nomarski optics, as described (Kershner *et al.* 2014). Each  
69 screen was done in two ways— first with single mutants *lst-1(ok814)* and *sygl-1(tm5040)* (Figure 1D,  
70 regimen 1) and then with each of the same mutants carrying a transgenic copy of wildtype *glp-1*  
71 (Sorensen *et al.* 2020) in addition to an endogenous copy of wildtype *glp-1* (Figure 1D, regimen 2).

72 *Allele identification:* Following isolation of a Glp mutant, the starting *lst-1* or *sygl-1* allele was crossed  
73 away to test whether the Glp phenotype depended on loss of *lst-1* or *sygl-1*. Mutations were then  
74 mapped to a chromosome and tested for their ability to complement alleles of likely candidate genes.  
75 Mutants that were fertile as single mutants and mapped to chromosome I were tested for  
76 complementation with *lst-1(ok814) I*. Briefly, the double mutant (e.g. *mut-x sygl-1*) was balanced over  
77 the green balancer *hT2[qIs48]*, crossed to *lst-1(ok814) sygl-1(tm5040)/hT2[qIs48]* males, and non-green  
78 L4 male progeny (e.g. *mut-x sygl-1/ lst-1 sygl-1*) scored for Glp. Mutants that were sterile as single  
79 mutants and mapped to chromosome III were tested for complementation with *glp-1(q175) III*. Briefly,  
80 *unc-32 glp-1(q175)/ hT2[qIs48]* males were mated to each suspected *glp-1* allele and non-green male  
81 progeny scored for Glp. If an allele failed to complement either *lst-1* or *glp-1*, then Sanger sequencing  
82 was used to identify the molecular lesion. The *glp-1(q823)* allele was sequenced 2382 bp upstream of  
83 the 5' UTR and 927 bp downstream of the 3' UTR in addition to the exons and introns, but no lesion was  
84 found.

85 Whole genome sequencing was used to identify the likely lesion in *q831*, which was sterile as a single  
86 mutant and mapped to the right arm of chromosome I. Briefly, we picked ~570 adult homozygotes,  
87 isolated DNA with Puregene Core Kit A (Qiagen ID: 158667) following manufacturer's directions and  
88 submitted the DNA (~100 ng) to the Wisconsin Biotechnology Core for sequencing using an Illumina  
89 MiSeq. The genome sequence was uploaded to a Galaxy server and analyzed by CloudMap, as  
90 previously described (Minevich *et al.* 2012). A premature stop codon occurred in one gene, *F33H2.5*,  
91 which resides on the right arm of chromosome I. *q831* failed to complement *F33H2.5 (gk49)* (Barstead  
92 *et al.* 2012), and the premature stop codon was confirmed by Sanger sequencing of DNA from *q831*  
93 homozygotes.

94 *Assay for temperature sensitivity of glp-1 alleles:* Balanced strains carrying *glp-1* alleles were maintained  
95 at 15°C, 20°C, or 25°C for at least one generation before homozygous *glp-1* L4 progeny were scored for  
96 Glp.

97 *pole-1 phenotype assay:* Homozygous *pole-1 (q831 or gk49)* animals were distinguished from the  
98 balancer *hln1[unc-54(h1040)]* by their kinked, uncoordinated movement. Homozygous mid-L4  
99 hermaphrodites were raised at 20°C, anesthetized in levamisole, mounted on an agarose pad, and  
100 examined using a Zeiss Axioskop compound scope (Crittenden *et al.* 2017). Vulva formation—wildtype,  
101 multivulva, or vulvaless—was scored in addition to germline defects.

102 *Immunostaining:* Strains were maintained at 20°C for immunostaining following published procedure  
103 (Crittenden *et al.* 2017). The SP56 polyclonal anti-sperm antibody (Ward *et al.* 1986), a gift from Susan  
104 Strome (UCSC, California), was diluted 1:200. The secondary antibody Alexa Fluor 555 donkey  $\alpha$ -mouse  
105 (1:1000, Invitrogen #A31570) was added with DAPI (1  $\mu$ g/mL) to mark DNA. Gonads were mounted in  
106 Vectashield (Vector Laboratories #H-1000), sealed with nail polish, and kept in the dark at 4°C until  
107 imaging.

108 *Microscopy:* DAPI/SP56 stained gonads were imaged with a Zeiss Axioskop compound microscope  
109 equipped with a Hamamatsu ORCA-Flash4.0 cMos camera and a 63/1.4 NA Plan Aplanachromat oil  
110 immersion objective. Carl Zeiss filter sets 49 and 43HE were used for the visualization of DAPI and Alexa  
111 555. Images were captured using Micromanager (Edelstein *et al.* 2010, 2014).

112 *lst-1 RNAi:* The *lst-1* RNAi clone from the Ahringer library (Fraser *et al.* 2000) was used. Briefly, *lst-1*  
113 RNAi or empty vector control (pL4440) containing HT115 bacteria were grown overnight at 37°C in 2xYT  
114 media containing 25  $\mu$ g/ $\mu$ l carbenicillin and 50  $\mu$ g/ $\mu$ l tetracycline. Cultures were concentrated, seeded  
115 onto Nematode Growth Medium (NGM) plates containing 1mM IPTG, then induced overnight. L4  
116 hermaphrodites were fed, allowed to self, and progeny were scored for the Glp phenotype by DIC.

117 *GLP-1 protein conservation:* Protein sequences for *C. elegans glp-1* orthologs from other *Caenorhabditis*  
118 species were acquired from Wormbase. Sequences of the ANK repeats were aligned using M-Coffee to  
119 examine amino acid conservation (<http://tcoffee.crg.cat/apps/tcoffee/do:mcoffee>) (Notredame *et al.*  
120 2000).

## 121 **Results and Discussion:**

### 122 *Screens for Glp mutants in lst-1 and sygl-1 single mutant backgrounds*

123 To identify new GSC regulators and perhaps new components of the PUF hub, we conducted genetic  
124 screens for mutations that cause a Glp phenotype in a *lst-1(lf)* or *sygl-1(lf)* single mutant background

125 (Figure 1D). Our initial screens simply mutagenized *lst-1(lf)* and *sygl-1(lf)* single mutants and scored  
126 their F2 progeny for the Glp phenotype (Figure 1D, regimen 1). We screened 8749 haploid genomes  
127 after mutagenesis of *lst-1(lf)* and 5504 haploid genomes after mutagenesis of *sygl-1(lf)* (Table 2). This  
128 first set of screens recovered ten mutants. However, outcrossing revealed that Glp phenotypes did not  
129 depend on either *lst-1(lf)* or *sygl-1(lf)*; therefore, these mutant alleles were not of genes functionally  
130 redundant with *lst-1* or *sygl-1*. Nine mutations, alleles *q817-q825*, caused a fully penetrant Glp  
131 phenotype and mapped to chromosome III (Table 3). Because the *glp-1* locus is large (~7.4 kb) and  
132 located on chromosome III, these nine mutations were likely *glp-1* alleles. Indeed, all nine failed to  
133 complement *glp-1(null)* (Table 3). The 10<sup>th</sup> allele *q831* caused a low penetrance Glp and was mapped to  
134 the right arm of chromosome I, at some distance from both *sygl-1* and *lst-1* loci. Therefore, this  
135 mutation must be a lesion in some other gene; its identity is described below.

136 The initial screens were heavily biased for the recovery of *glp-1* alleles. To limit the isolation of  
137 more *glp-1* alleles, we introduced a transgenic copy of wildtype *glp-1* into the *lst-1(lf)* and *sygl-1(lf)*  
138 single mutants (Figure 1D; Table 2). The *glp-1* transgene, *qSi44* or *glp-1(tg)*, is a single copy insertion of  
139 wildtype *glp-1* on chromosome II that rescues a *glp-1* null mutant (Sorensen *et al.* 2020). Using the  
140 same EMS mutagenesis procedure as before, we screened 7922 *lst-1(lf); glp-1(tg)* haploid genomes and  
141 3868 *sygl-1(lf); glp-1(tg)* haploid genomes. No Glp mutants were isolated from *lst-1(lf); glp-1(tg)* but  
142 two were recovered from *sygl-1(lf); glp-1(tg)* (Table 2). These mutations were subsequently determined  
143 to be alleles of *lst-1* (see below). Table 3 summarizes the genetic characterization of alleles recovered  
144 from the screen, and Table 4 summarizes their molecular lesions. Our failure to recover *sygl-1* alleles in  
145 the *lst-1(lf)* background shows that our screens were not performed to saturation. However, we note  
146 that the *sygl-1* locus is relatively small (621 bp coding region) and therefore likely a poor mutagenesis  
147 target.

#### 148 *Characterization of lst-1 alleles*

149 The *lst-1* locus generates two RNA isoforms – one longer, called *lst-1L*, and one shorter, called *lst-1S*  
150 (Figure 2A; Table 4). Most *lst-1* alleles available prior to this work were isolated in deletion screens  
151 (Kershner *et al.* 2014) or engineered by CRISPR/Cas9 gene editing (Haupt *et al.* 2019a). In addition, one  
152 allele from these screens was previously reported, the nonsense mutant *lst-1(q826)* (Shin *et al.* 2017).  
153 Here we report a second allele obtained in the screen, *lst-1(q827)*, which alters the 5' splice site in *lst-1L*  
154 intron 2 (Figure 2A; Table 4). As previously reported for *lst-1(q826)*, *lst-1(q827)* was confirmed by  
155 complementation tests and Sanger sequencing. Both alleles are phenotypically similar to previously  
156 characterized *lst-1(lf)* mutants: as a single mutant, they appear wildtype and as *lst-1 sygl-1* double  
157 mutants they are Glp. These *lst-1* alleles will prove useful in future studies focused on *lst-1* function.

#### 158 *Characterization of glp-1 alleles*

159 We identified the molecular lesions in the *glp-1* alleles with Sanger sequencing: *q818*, *q821*, and  
160 *q822* were nonsense mutants; *q817*, *q819*, and *q820* were missense mutants and *q825* altered a 5'  
161 splice site (Figure 2B; Table 4). The *q824* allele had a 2 bp change (AC→CA) in intron 4 that did not affect  
162 the 5' or 3' splice sites or the branch point (Figure 2B). We failed to determine the lesion in one allele,  
163 *q823*, despite sequencing all exons and introns plus 2382 bp upstream of the transcription start site and  
164 927 bp downstream of the 3' UTR. Nonetheless, the remaining eight alleles were all previously  
165 unreported *glp-1* lesions.

166 The three *glp-1* missense alleles—*q817*, *q819*, and *q820* – all carry amino acid changes in the  
167 Ankyrin (ANK) repeats (Figure 2B and 2C). ANK repeats are conserved across eukaryotes with roles in  
168 protein interaction, cell signaling, and disease (Roehl *et al.* 1996; Mosavi *et al.* 2004). Many previously

169 identified *glp-1* alleles also have changes in this region. Mutations in ANK repeats 1, 2, 4, and 5 all cause  
170 a temperature sensitive Glp phenotype (Kodoyianni *et al.* 1992; Berry *et al.* 1997; Nadarajan *et al.* 2009;  
171 Dalfo *et al.* 2010). Our three newly identified missense alleles occur in different repeats, ANK 3 (*q819*  
172 and *q820*) and ANK 6 (*q817*) and they are not temperature sensitive (Table 5). All three affect conserved  
173 residues (Figure 3). We conclude that the newly identified ANK missense mutations affect residues  
174 essential for GLP-1 function. These alleles should prove useful for investigating ANK repeats and their  
175 role in Notch signaling.

#### 176 *Characterization of pole-1(q831)*

177 One mutant allele isolated in the *sygl-1(lf)* background, *q831*, mapped to the right arm chromosome  
178 I. Whole genome sequencing revealed a nonsense mutation R1899Stop in *F33H2.5* (Table 4), which  
179 encodes a *C. elegans* ortholog of the catalytic subunit of DNA polymerase  $\epsilon$  (Figure 4A). We confirmed  
180 *q831* as an allele of *F33H2.5* by Sanger sequencing, and by its failure to complement *gk49*, a deletion  
181 allele in *F33H2.5* that had been generated by the *C. elegans* Knockout Consortium (Barstead *et al.* 2012).  
182 *F33H2.5* has been named *pole-1* for its DNA polymerase  $\epsilon$  orthology.

183 The *pole-1(q831)* mutation was isolated because *sygl-1(lf) pole-1(q831)* double mutants were Glp.  
184 During outcrossing, we found that *pole-1(q831)* single mutants were 100% sterile (Figure 4D-F). To ask if  
185 *pole-1* sterility was due to a Glp defect, we examined L4 larvae under DIC/Normaski and also stained  
186 dissected gonads with a sperm-specific antibody (SP56) (Ward *et al.* 1986) and DAPI (Figure 4B-F) (see  
187 Methods). Wildtype L4 gonads contain several hundred germ cells, with undifferentiated cells at the  
188 distal end and differentiated sperm at the proximal end (Figure 4B). *glp-1(null)* L4 gonads, by contrast,  
189 contain only a few germ cells, all of which have differentiated into SP56-positive sperm extending to the  
190 distal end (Figure 4C). Similar to *glp-1(null)* gonads, the *pole-1(q831)* gonads were physically smaller  
191 than wildtype; however only ~30% had differentiated sperm extending to the distal end and thus were  
192 Glp (Figure 4D and F). The other ~70% did not have sperm extending to the distal end and were  
193 designated nonGlp steriles (Figure 4E and F). We also observed a low penetrance Glp phenotype in the  
194 deletion strain *pole-1(gk49)*(Figure 4A, 4F). In addition to germline defects, *pole-1* mutants had a range  
195 of other defects, consistent with a broad role in development. For example, *pole-1* mutants had vulval  
196 defects (Figure 4F) and were uncoordinated.

197 We next asked if the *pole-1* Glp phenotype was enhanced by loss of either *lst-1* or *sygl-1*. Whereas  
198 *pole-1(q831)* single mutants were 30% Glp, *pole-1(q831) lst-1(RNAi)* animals were 80% Glp and *pole-*  
199 *1(q831) sygl-1(lf)* double mutants were 65% Glp (Figure 4F). Thus, loss of either *lst-1* or *sygl-1* enhanced  
200 the *pole-1* Glp defect. However, *pole-1* vulval defects were not similarly enhanced (Figure 4F). DNA  
201 polymerase  $\epsilon$  *pole-1* had not been recognized as having an effect on GSC regulation though other  
202 components of the DNA replication machinery have been implicated in germ cell proliferation (Yoon *et*  
203 *al.* 2018). We conclude that *sygl-1* and *lst-1* are germline enhancers of *pole-1*.

#### 204 **Conclusions and future directions:**

205 The goal of the mutant screens in *lst-1* and *sygl-1* mutant backgrounds was to identify new  
206 regulators of GSC self-renewal. In particular, we sought to test the idea that the LST-1 and SYGL-1  
207 proteins might work with other factors that were similarly redundant. The screens identified nine alleles  
208 of *glp-1*, two alleles of *lst-1* and one allele of *pole-1*—the *C. elegans* ortholog of DNA polymerase  $\epsilon$ .  
209 Although the screens were not saturated, identification of *pole-1* with a low penetrance Glp phenotype  
210 demonstrates that additional genes likely await discovery. Any additional screens in *lst-1* or *sygl-1*  
211 mutant backgrounds should focus on the modified design with transgenic *glp-1* to avoid isolation of

212 more *glp-1* alleles. Alternatively, one might seek suppressors of *lst-1* or *sygl-1* tumors (Shin *et al.* 2017)  
213 or enhancers of the low penetrance *pole-1* Glp phenotype.

214 **Acknowledgements:** We thank past and present members of the Kimble and Wickens labs for  
215 thoughtful discussions during the screens. We thank Erika Sorensen for sharing *glp-1(tg)* prior to  
216 publication, and Jadwiga Forster for technical support. The *gk49* allele was provided by the CGC, which  
217 is funded by NIH Office of Research Infrastructure Programs (P40 OD010440). SR-T was supported by the  
218 NSF Graduate Research Fellowship under Grant DGE-1256259 and NIH Predoctoral Training Grant in  
219 Genetics 5T32GM007133. JK was an Investigator of the Howard Hughes Medical Institute and is now  
220 supported by NIH R01 GM134119.

221 Author Contributions:

222 A.K, H.S, K.H and J.K designed screens and methods for mutant characterization; A.K, H.S, K.H., PK-C and  
223 J.K. performed screens; H.S. and K. H. characterized *lst-1* alleles; SR-T characterized *glp-1* alleles; A. K.  
224 and SR-T characterized *pole-1* alleles; SR-T, A.K, H.S, K.H, and J.K wrote the paper.  
225

226 **Figure Legends and Tables**

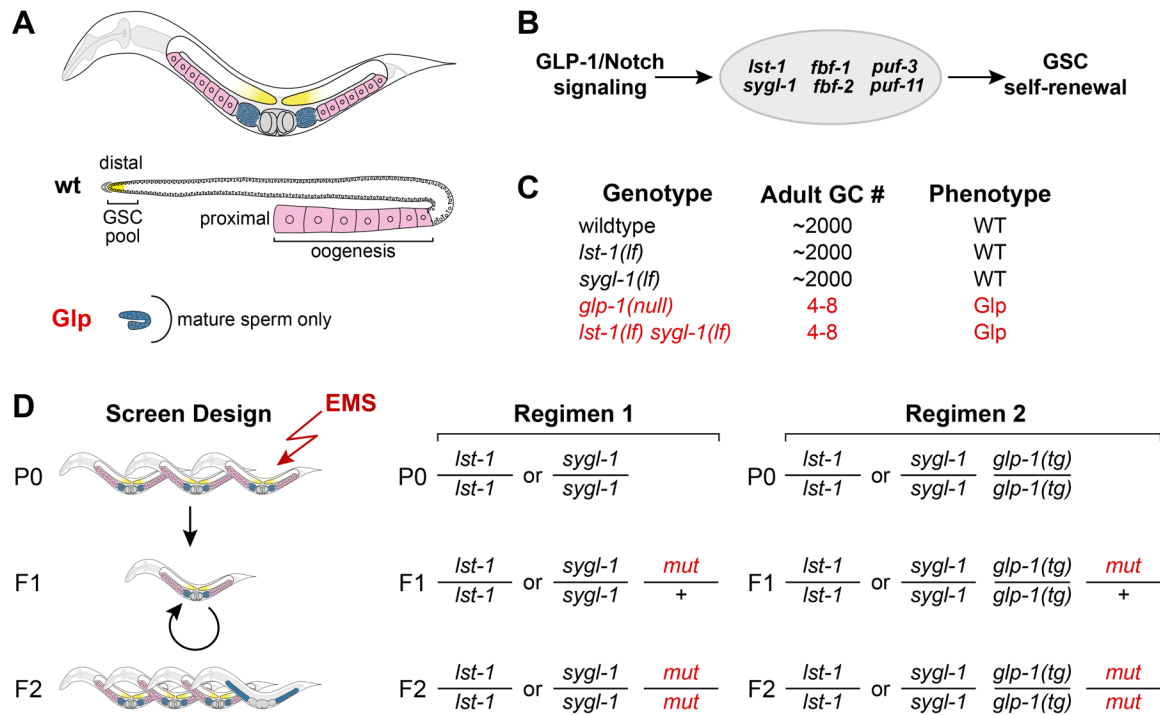

227

228 **Figure 1: Genetic screens for synthetic Glp mutants.** **A.** Top, adult hermaphrodite has two-U-shaped  
 229 gonadal arms (GSCs, yellow; blue, sperm; pink, oocytes). Sperm made during larval development are  
 230 stored in spermatheca. Middle, wildtype germline with a GSC pool (yellow) distally and oocytes (pink)  
 231 proximally. Bottom, Glp adult germline with only a few mature sperm (blue). **B.** Molecular regulation  
 232 of GSC self-renewal. GLP-1/Notch signaling activates transcription of *lst-1* and *sygl-1*, which are  
 233 components of the PUF regulatory hub, along with *fbf-1*, *fbf-2*, *puf-3*, and *puf-11* (Haupt *et al.* 2019b). **C.**  
 234 Adult germ cell (GC) numbers and phenotypes of specified genotypes. **D.** Strategies to identify genes  
 235 that have a synthetic Glp phenotype with *lst-1* or *sygl-1*. Regimen 1 mutagenizes *lst-1(lf)* or *sygl-1(lf)*  
 236 homozygotes and scores for Glp sterility in the F<sub>2</sub>. Regimen 2 mutagenizes *lst-1(lf)* or *sygl-1(lf)*  
 237 homozygotes that also carry a wildtype *glp-1* transgene, *glp-1(tg)*, to avoid isolation of *glp-1* mutations.

238

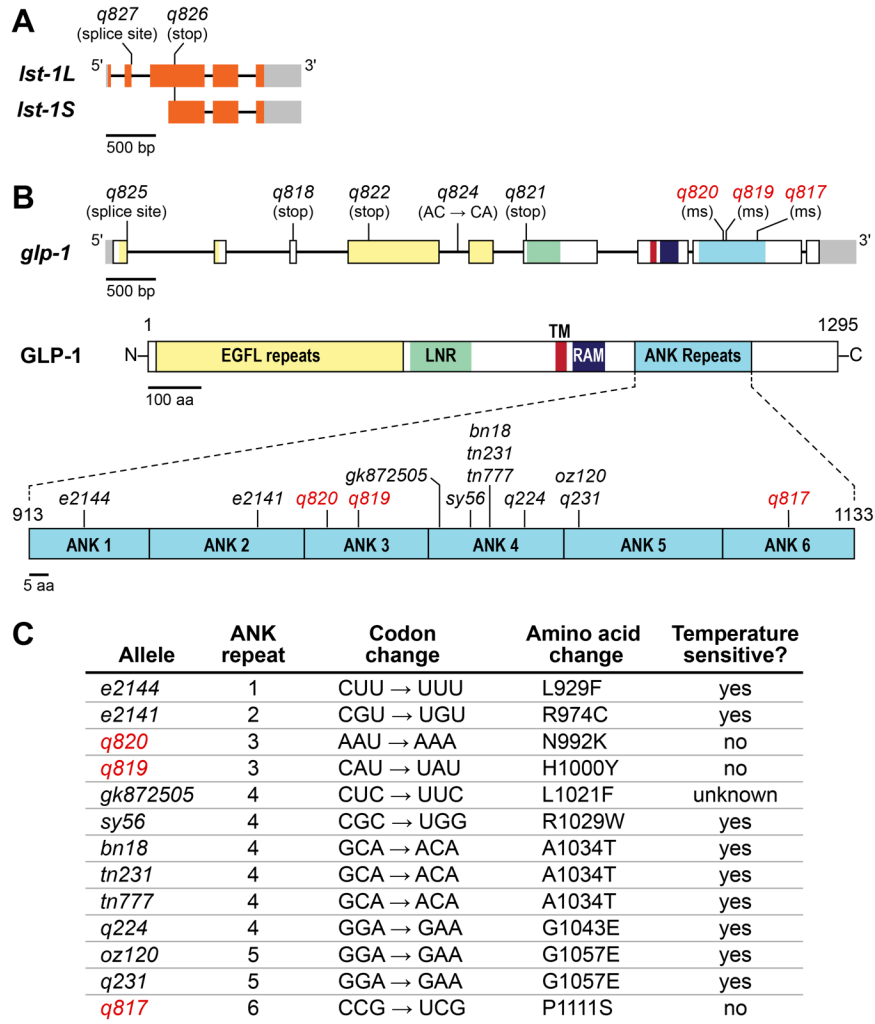

239

240 **Figure 2: *Ist-1* and *glp-1* alleles recovered from screens. A-B.** Architecture of *Ist-1* and *glp-1* loci. Boxes,  
 241 exons with untranslated regions in gray; introns, lines connecting exons. **A.** The *Ist-1* locus generates  
 242 two RNA isoforms, *Ist-1L* and *Ist-1S*. Mutations isolated in screens shown above; see Table 4 for  
 243 molecular changes. **B.** The *glp-1* locus generates one RNA isoform and one protein product. Regions  
 244 within exons are colored according to protein domains: yellow, EGF-like (EGFL) repeats; green, *lin-*  
 245 *12/Notch* Repeats (LNR); red, transmembrane domain (TM); dark blue, RAM domain; light blue, Ankyrin  
 246 (ANK) repeats. Mutations in the ANK repeats that are shown below include those from this work (red)  
 247 and those published previously (Austin and Kimble 1987; Kodoyianni *et al.* 1992; Berry *et al.* 1997; Dalfo  
 248 *et al.* 2010; Thompson *et al.* 2013). Not shown are ANK repeat mutations isolated as intragenic  
 249 suppressors of *glp-1(q231)* and *glp-1(q224)*(Lissemore *et al.* 1993). Ms, missense. **C.** Key features of *glp-*  
 250 *1* mutations in ANK repeats. See Table 4 for molecular changes in other *glp-1* alleles and Table 5 for  
 251 temperature sensitivity data.  
 252



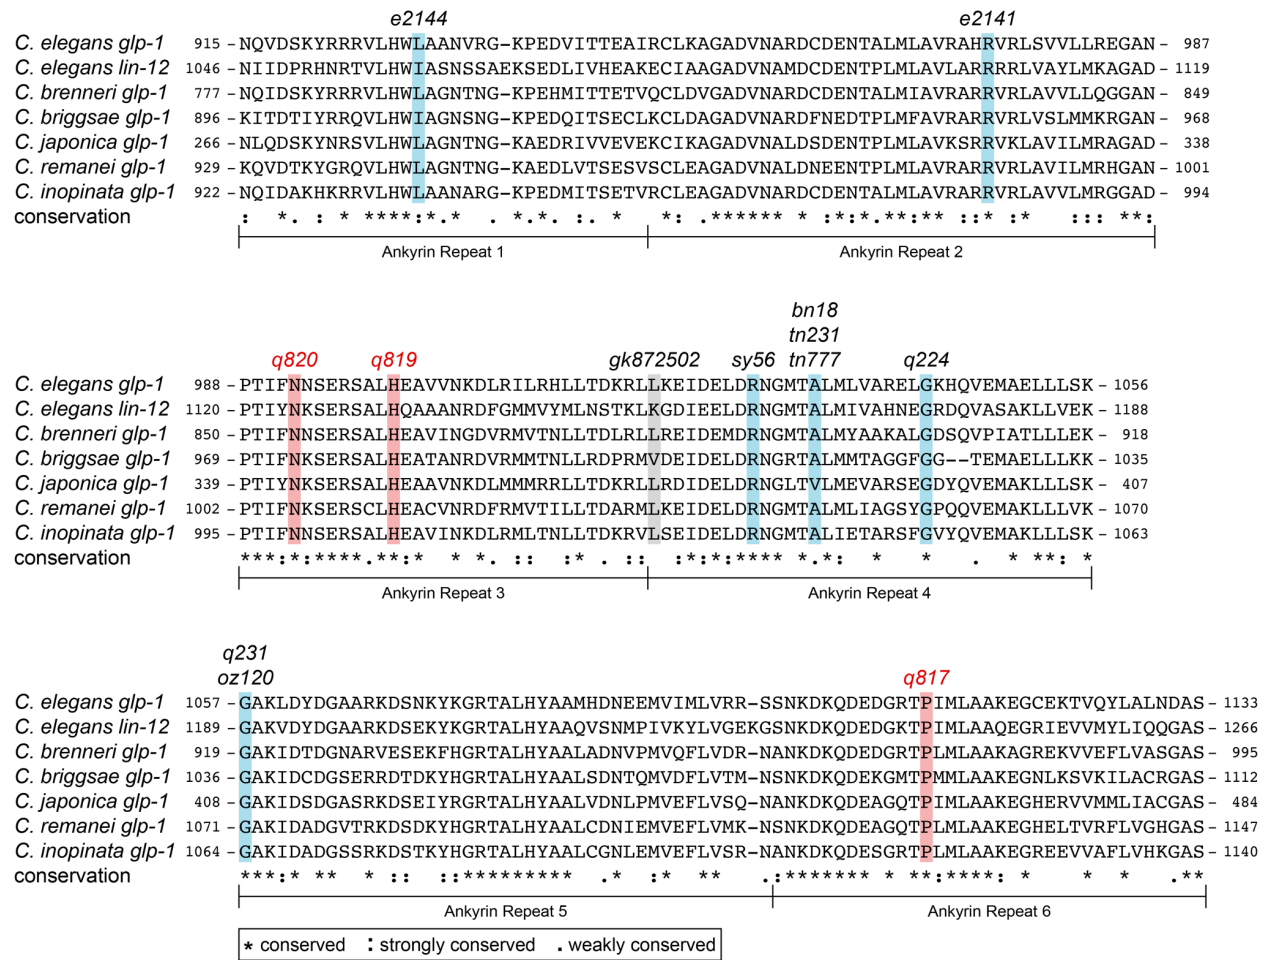

253  
254

255 **Figure 3: Amino acid alignment for ANK repeats *glp-1* orthologs and in the paralog *lin-12*.** Alleles from  
256 Figure 2C are marked. Blue bar, mutation causes sterility at 25°C but not at 15°C; red bar, mutation  
257 causes sterility at 15°C, 20°C and 25°C. The residue affected in *gk872502* is marked by a gray bar,  
258 because it has not been tested for temperature sensitivity. ANK repeat location within each paralog is  
259 shown beside amino acids. See legend for conservation key.

260

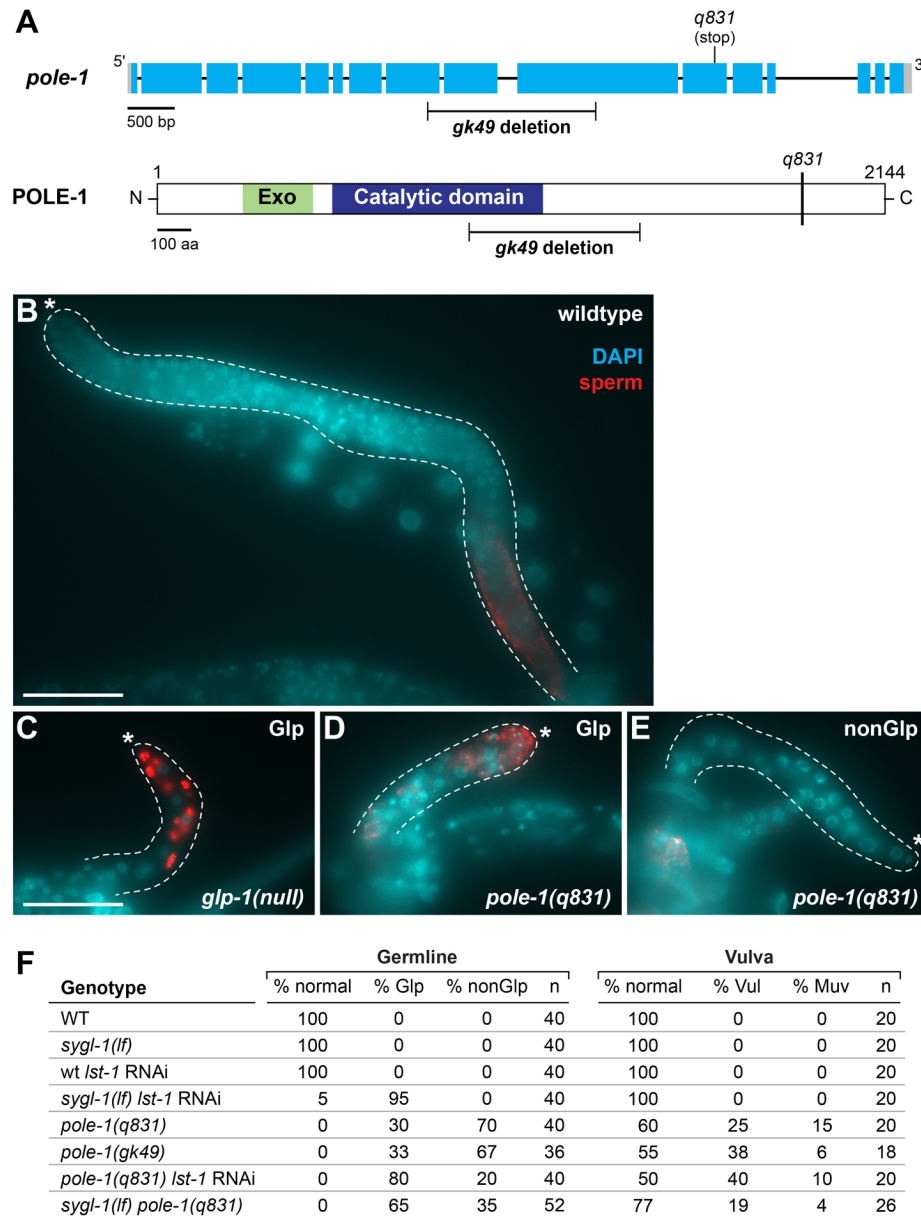

261

262 **Figure 4: *pole-1* characterization.** **A.** Diagrams of *pole-1* RNA and protein structures. Marked mutations  
 263 include *gk49* (Barstead *et al.* 2012) and *q831* (this work). Conventions for gene structure as in figure 2.  
 264 Protein domains: exonuclease (Exo) domain, green; DNA polymerase  $\epsilon$  catalytic domain, dark blue  
 265 (Pospiech and Syväoja 2003). **B-E.** Dissected mid-L4 gonads stained with SP56 antibodies for sperm  
 266 (red) and with DAPI for DNA (blue) (see Methods). Dotted line outlines each gonad; asterisk marks the  
 267 distal end. Scale, 50  $\mu$ m. **B.** Wildtype. **C.** *glp-1* Glp germline. **D.** Glp *pole-1(q831)* germline. **E.** NonGlp  
 268 *pole-1(q831)* germline. **F.** Low penetrance *pole-1* Glp phenotype is enhanced by loss of either *lst-1* and  
 269 *sygl-1*. Germline “normal” refers to an adult germline similar to wildtype in size and organization;  
 270 “Glp” refers to a smaller than normal germline with sperm to distal end; “nonGlp” refers to a smaller  
 271 than normal germline without sperm at the distal end. Vulva: “normal” refers a vulva similar to a  
 272 wildtype morphology; “Vul” denotes Vulvaless; “Muv” denotes Multivulva. n, number of germlines or  
 273 vulvas scored.

274

275 **Table 1: Strains used in study**

| Strain | Genotype                                                             | Reference                                |
|--------|----------------------------------------------------------------------|------------------------------------------|
| N2     | Wildtype                                                             | (Brenner 1974)                           |
| JK2877 | <i>unc-32(e189) glp-1(q175) III/ hT2[qIs48] (I; III)</i>             | This work                                |
| JK4356 | <i>lst-1(ok814) I</i>                                                | (Kershner <i>et al.</i> 2014)            |
| JK4774 | <i>lst-1(ok814) sygl-1(tm5040) I/ hT2[qIs48] (I; III)</i>            | (Kershner <i>et al.</i> 2014)            |
| JK4899 | <i>sygl-1(tm5040) I</i>                                              | (Kershner <i>et al.</i> 2014)            |
| JK5135 | <i>sygl-1(tm5040) I; qSi44[Pglp-1::6XMYC::6xHIS::glp-1 3'end] II</i> | (Sorensen <i>et al.</i> 2020); This work |
| JK5203 | <i>lst-1(ok814) I; qSi44[Pglp-1::6MYC::6XHIS::glp-1 3' end] II</i>   | (Sorensen <i>et al.</i> 2020); This work |
| JK5209 | <i>lst-1(q827) sygl-1(tm5040) I/ hT2[qIs48](I;III)</i>               | This work                                |
| JK5277 | <i>lst-1(q826) I/ hT2[qIs48](I;III)</i>                              | (Shin <i>et al.</i> 2017)                |
| JK5305 | <i>lst-1(q827) I/ hT2[qIs48](I;III)</i>                              | This work                                |
| JK5315 | <i>lst-1(q826) sygl-1(tm5040) I/ hT2[qIs48] I;III</i>                | (Shin <i>et al.</i> 2017)                |
| JK5606 | <i>lst-1(ok814) pole-1(q831) I/ hln1 [unc-54(h1040)] I</i>           | This work                                |
| JK5293 | <i>sygl-1(tm5040) pole-1(q831) I/ hln1[unc-54(h1040)] I</i>          | This work                                |
| JK5250 | <i>pole-1(q831) I/ hln1[unc-54(h1040)] I</i>                         | This work                                |
| JK5268 | <i>pole(gk49) I/ hln1[unc-54(1040)] I</i>                            | This work                                |
| JK5546 | <i>glp-1(q819) III/hT2[qIs48] (I; III)</i>                           | This work                                |
| JK5547 | <i>glp-1(q824) III/hT2[qIs48] (I; III)</i>                           | This work                                |
| JK5568 | <i>glp-1(q818) III/hT2[qIs48] (I; III)</i>                           | This work                                |
| JK5569 | <i>glp-1(q822) III/hT2[qIs48] (I; III)</i>                           | This work                                |
| JK5570 | <i>glp-1(q825) III/hT2[qIs48] (I; III)</i>                           | This work                                |
| JK5575 | <i>glp-1(q817) III /hT2[qIs48] (I; III)</i>                          | This work                                |
| JK5576 | <i>glp-1(q820) III/hT2[qIs48] (I; III)</i>                           | This work                                |
| JK5577 | <i>glp-1(q821) III/hT2[qIs48] (I; III)</i>                           | This work                                |
| JK5578 | <i>glp-1(q823) III/hT2[qIs48] (I; III)</i>                           | This work                                |

276

277 **Table 2: Summary of screens and alleles recovered**

| Parental Genotype <sup>1</sup> | Copies of <i>glp-1(+)</i> <sup>2</sup> | Number of haploid genomes screened | Glp mutants recovered <sup>3</sup> | Gene identities                   |
|--------------------------------|----------------------------------------|------------------------------------|------------------------------------|-----------------------------------|
| <i>lst-1(lf) I</i>             | 2                                      | 8749                               | 6                                  | 6 <i>glp-1</i>                    |
| <i>lst-1(lf) I; qSi44 II</i>   | 4                                      | 7922                               | 0                                  | n/a                               |
| <i>sygl-1(lf) I</i>            | 2                                      | 5504                               | 4                                  | 3 <i>glp-1</i><br>1 <i>pole-1</i> |
| <i>sygl-1(lf) I; qSi44 II</i>  | 4                                      | 3868                               | 2                                  | 2 <i>lst-1</i>                    |

278 <sup>1</sup> Alleles were *lst-1(ok814)* and *sygl-1(tm5040)*.

279 <sup>2</sup> Animals without qSi44 have two endogenous copies of *glp-1(+)*. Animals with qSi44 have two  
280 endogenous and two transgenic copies of *glp-1(+)*.

281 <sup>3</sup> Mutants with Glp phenotype—small germline and sperm to distal end (Austin and Kimble 1987)

282

283 **Table 3: Genetic characterization of sterile mutants from screens**

| Allele      | LG <sup>1</sup> | Glp <sup>2</sup> | Failure to complement <sup>3</sup> |
|-------------|-----------------|------------------|------------------------------------|
| <i>q817</i> | III             | +++              | <i>glp-1(q175)</i>                 |
| <i>q818</i> | III             | +++              | <i>glp-1(q175)</i>                 |
| <i>q819</i> | III             | +++              | <i>glp-1(q175)</i>                 |
| <i>q820</i> | III             | +++              | <i>glp-1(q175)</i>                 |
| <i>q821</i> | III             | +++              | <i>glp-1(q175)</i>                 |
| <i>q822</i> | III             | +++              | <i>glp-1(q175)</i>                 |
| <i>q823</i> | III             | +++              | <i>glp-1(q175)</i>                 |
| <i>q824</i> | III             | +++              | <i>glp-1(q175)</i>                 |
| <i>q825</i> | III             | +++              | <i>glp-1(q175)</i>                 |
| <i>q826</i> | I               | –                | <i>lst-1(ok814)</i>                |
| <i>q827</i> | I               | –                | <i>lst-1(ok814)</i>                |
| <i>q831</i> | I               | +                | <i>pole-1(gk49)</i>                |

284 <sup>1</sup> LG, linkage group

285 <sup>2</sup> +++ , 100% penetrance; +, ~30% penetrance; –, not Glp as single mutants.

286 <sup>3</sup> Allele used in complementation test.

287

288 **Table 4: Molecular lesions in alleles recovered from the screen**

| Gene(allele)                    | Type of Mutation | Nucleotide Change                | Codon change <sup>1</sup> | Amino acid change <sup>1</sup> |
|---------------------------------|------------------|----------------------------------|---------------------------|--------------------------------|
| <i>glp-1(q817)</i>              | missense         | C → T                            | CCG → UCG                 | P1111S                         |
| <i>glp-1(q818)</i>              | nonsense         | C → T                            | CAA → UAA                 | Q98Stop                        |
| <i>glp-1(q819)</i>              | missense         | C → T                            | CAU → UAU                 | H1000Y                         |
| <i>glp-1(q820)</i>              | missense         | T → A                            | AAU → AAA                 | N992K                          |
| <i>glp-1(q821)</i>              | nonsense         | C → T                            | CGA → UGA                 | R499Stop                       |
| <i>glp-1(q822)</i>              | nonsense         | T → G                            | UAU → UAG                 | Y176Stop                       |
| <i>glp-1(q823)</i> <sup>2</sup> | unknown          | not found                        | n/a                       | n/a                            |
| <i>glp-1(q824)</i>              | substitution     | AC → CA in intron 4 <sup>3</sup> | n/a                       | n/a                            |
| <i>glp-1(q825)</i>              | splice site      | G → A                            | n/a                       | n/a                            |
| <i>lst-1(q826)</i>              | nonsense         | C → T                            | CGA → UGA                 | R114Stop                       |
| <i>lst-1(q827)</i>              | splice site      | G → A                            | n/a                       | n/a                            |
| <i>pole-1(q831)</i>             | nonsense         | G → A                            | UGG → UGA                 | W1899Stop                      |

289 <sup>1</sup> n/a, not applicable

290 <sup>2</sup> see methods for more details

291 <sup>3</sup> 184 bp from 5' splice site

292 **Table 5: *glp-1* alleles and temperature sensitivity**

| Allele      | % Glp 25°C | % Glp 20°C | % Glp 15°C | n <sup>1</sup>  |
|-------------|------------|------------|------------|-----------------|
| N2          | 0          | 0          | 0          | 20              |
| <i>q175</i> | 100        | 100        | 100        | 20              |
| <i>q817</i> | 100        | 100        | 100        | 40 <sup>2</sup> |
| <i>q818</i> | 100        | 100        | 100        | 20              |
| <i>q819</i> | 100        | 100        | 100        | 40              |
| <i>q820</i> | 100        | 100        | 100        | 40              |
| <i>q821</i> | 100        | 100        | 100        | 20              |
| <i>q822</i> | 100        | 100        | 100        | 20              |
| <i>q823</i> | 100        | 100        | 100        | 20              |
| <i>q824</i> | 100        | 100        | 100        | 20              |
| <i>q825</i> | 100        | 100        | 100        | 20              |

293 <sup>1</sup> n, number germlines scored.

294 <sup>2</sup>For *q817* at 15°C, 38 germlines scored.

295

296 References:

- 297 Austin, J., and J. Kimble, 1987 *glp-1* is required in the germ line for regulation of the decision between  
298 mitosis and meiosis in *C. elegans*. *Cell* 51: 589–599.
- 299 Barstead, R., G. Moulder, B. Cobb, S. Frazee, D. Henthorn *et al.*, 2012 Large-scale screening for targeted  
300 knockouts in the *Caenorhabditis elegans* genome. *G3 Genes, Genomes, Genet.* 2: 1415–1425.
- 301 Berry, L. W., B. Westlund, and T. Schedl, 1997 Germ-line tumor formation caused by activation of *glp-1*,  
302 a *Caenorhabditis elegans* member of the Notch family of receptors. *Development* 124: 925–936.
- 303 Brenner, S., 1974 The genetics of *Caenorhabditis elegans*. *Genetics* 77: 71–94.
- 304 Crittenden, S. L., D. S. Bernstein, J. L. Bachorik, B. E. Thompson, M. Gallegos *et al.*, 2002 A conserved  
305 RNA-binding protein controls germline stem cells in *Caenorhabditis elegans*. *Nature* 417: 660–663.
- 306 Crittenden, S. L., H. S. Seidel, and J. Kimble, 2017 Analysis of the *C. elegans* germline stem cell pool.  
307 *Methods Mol. Biol.* 1463: 1–33.
- 308 Dalfo, D., J. R. Priess, R. Schnabel, and E. Jane Albert Hubbard, 2010 *glp-1(e2141)* sequence correction.  
309 *Worm Breeder's Gaz.* 18: 4.
- 310 Edelstein, A., N. Amodaj, K. Hoover, R. Vale, and N. Stuurman, 2010 Computer control of microscopes  
311 using microManager. *Curr Protoc Mol Biol* Chapter 14: Unit14 20.
- 312 Edelstein, A. D., M. A. Tsuchida, N. Amodaj, H. Pinkard, R. D. Vale *et al.*, 2014 Advanced methods of  
313 microscope control using  $\mu$ Manager software. *J Biol Methods* 1:.
- 314 Fraser, A. G., R. S. Kamath, P. Zipperlen, M. Martinez-Campos, M. Sohrmann *et al.*, 2000 Functional  
315 genomic analysis of *C. elegans* chromosome I by systematic RNA interference. *Nature* 408: 325–  
316 330.
- 317 Gordon, K., 2020 Recent advances in the genetic, anatomical, and environmental regulation of the *C.*  
318 *elegans* germ line progenitor zone. *J. Dev. Biol.* 8: 14.
- 319 Haupt, K. A., A. L. Enright, A. S. Ferdous, A. M. Kershner, H. Shin *et al.*, 2019a LST-1 acts in trans with a  
320 conserved RNA-binding protein to maintain stem cells. .
- 321 Haupt, K. A., K. T. Law, A. L. Enright, C. R. Kanzler, H. Shin *et al.*, 2019b A PUF Hub Drives Self-Renewal in  
322 *Caenorhabditis elegans* Germline Stem Cells. *Genetics*.
- 323 Hubbard, E. J., and T. Schedl, 2019 Biology of the *Caenorhabditis elegans* germline stem cell system.  
324 *Genetics* 213: 1145–1188.
- 325 Jane Albert Hubbard, E., and D. Greenstein, 2000 The *Caenorhabditis elegans* Gonad: A Test Tube for  
326 Cell and Developmental Biology.:
- 327 Kershner, A. M., H. Shin, T. J. Hansen, and J. Kimble, 2014 Discovery of two GLP-1/Notch target genes  
328 that account for the role of GLP-1/Notch signaling in stem cell maintenance. *Proc. Natl. Acad. Sci.*  
329 *U. S. A.* 111: 3739–3744.
- 330 Kodoyianni, V., E. M. Maine, and J. Kimble, 1992 Molecular basis of loss-of-function mutations in the *glp-*  
331 *1* gene of *Caenorhabditis elegans*. *Mol. Biol. Cell* 3: 1199–1213.
- 332 Lissemore, J. L., P. D. Currie, C. M. Turk, and E. M. Maine, 1993 Intragenic dominant suppressors of *glp-1*,



- 333 a gene essential for cell-signaling in *Caenorhabditis elegans*, support a role for *cdc10/SWI6/ankyrin*  
334 motifs in *GLP-1* function. *Genetics* 135: 1023–1034.
- 335 Minevich, G., D. S. Park, D. Blankenberg, R. J. Poole, and O. Hobert, 2012 *CloudMap*: A cloud-based  
336 pipeline for analysis of mutant genome sequences. *Genetics* 192: 1249–1269.
- 337 Mosavi, L. K., T. J. Cammett, D. C. Desrosiers, and Z. Peng, 2004 The ankyrin repeat as molecular  
338 architecture for protein recognition. *Protein Sci.* 13: 1435–1448.
- 339 Nadarajan, S., J. A. Govindan, M. McGovern, E. J. A. Hubbard, and D. Greenstein, 2009 *MSP* and *GLP-*  
340 *1/Notch* signaling coordinately regulate actomyosin-dependent cytoplasmic streaming and oocyte  
341 growth in *C. elegans*. *Development* 136: 2223–2234.
- 342 Notredame, C., D. G. Higgins, and J. Heringa, 2000 *T-Coffee*: A novel method for fast and accurate  
343 multiple sequence alignment. *J. Mol. Biol.* 302: 205–217.
- 344 Pospiech, H., and J. E. Syväoja, 2003 DNA polymerase epsilon - more than a polymerase.  
345 *ScientificWorldJournal.* 3: 87–104.
- 346 Qiu, C., V. D. Bhat, S. Rajeev, C. Zhang, A. E. Lasley *et al.*, 2019 A crystal structure of a collaborative RNA  
347 regulatory complex reveals mechanisms to refine target specificity. *Elife* 8:.
- 348 Roehl, H., M. Bosenberg, R. Belloch, and J. Kimble, 1996 Roles of the *RAM* and *ANK* domains in signaling  
349 by the *C. elegans GLP-1* receptor. *EMBO J.* 15: 7002–7012.
- 350 Shin, H., K. A. Haupt, A. M. Kershner, P. Kroll-Conner, M. Wickens *et al.*, 2017 *SYGL-1* and *LST-1* link niche  
351 signaling to *PUF* RNA repression for stem cell maintenance in *Caenorhabditis elegans*. *PLoS Genet.*  
352 13: e1007121.
- 353 Siegfried, K., and J. Kimble, 2002 *POP-1* controls axis formation during early gonadogenesis in *C. elegans*.  
354 *Development* 129: 443–453.
- 355 Simons, B. D., and H. Clevers, 2011 Strategies for homeostatic stem cell self-renewal in adult tissues. *Cell*  
356 145: 851–862.
- 357 Sorensen, E. B., H. S. Seidel, S. L. Crittenden, J. H. Ballard, and J. Kimble, 2020 A toolkit of tagged *glp-1*  
358 alleles reveals strong *glp-1* expression in the germline, embryo, and spermatheca. *microPublication*  
359 *Biol.* 2020:.
- 360 Thompson, O., M. Edgley, P. Strasbourger, S. Flibotte, B. Ewing *et al.*, 2013 The million mutation project:  
361 A new approach to genetics in *Caenorhabditis elegans*. *Genome Res.* 23: 1749–1762.
- 362 Ward, S., T. M. Roberts, S. Strome, F. M. Pavalko, and E. Hogan, 1986 Monoclonal antibodies that  
363 recognize a polypeptide antigenic determinant shared by multiple *Caenorhabditis elegans* sperm-  
364 specific proteins. *J. Cell Biol.* 102: 1778–1786.
- 365 Yoon, D. S., D. S. Cha, M. A. Alfhili, B. D. Keiper, and M. H. Lee, 2018 Subunits of the DNA polymerase  
366 alpha-primase complex promote *Notch*-mediated proliferation with discrete and shared functions  
367 in *C. elegans* germline. *FEBS J.*
- 368 Zetka, M.-C., and A. M. Rose, 1992 The meiotic behavior of an inversion in *Caenorhabditis elegans*.  
369 *Genetics* 131: 321–332.
- 370
